# Supplementary material for: How health systems approached respiratory viral pandemics over time: a systematic review
Source: HighWire-hosted journal article supplement (doi:10.1136/bmjgh-2020-003677), 2020-12-01
Supplement: bmjgh-2020-003677supp001_data_supplement.pdf [file bmjgh-2020-003677supp001_data_supplement.pdf]

**PUBMED**

(( "Pandemics/organization and administration"[Mesh] OR "Pandemics/prevention and control"[Mesh] ) OR ( "Disease Outbreaks/organization and administration"[Mesh]) OR ( "Epidemics/organization and administration"[Mesh] OR "Epidemics/prevention and control"[Mesh] )

AND

(( "SARS Virus" [Mesh]) OR ("Middle East Respiratory Syndrome Coronavirus"[Mesh]) OR post-MERS-CoV OR ("Influenza Pandemic, 1918-1919"[Mesh]) OR ("Influenza A Virus, H1N1 Subtype" [Mesh]) OR "COVID-19" [Supplementary Concept] OR ("severe acute respiratory syndrome coronavirus 2" [Supplementary Concept]) OR COVID19 OR covid19 OR covid-19 OR COVID-19 OR "novel coronavirus" OR "new coronavirus" OR "coronavirus disease 2019" OR SARS-CoV-2 OR post-COVID-19 OR post-outbreak OR post-pandemic OR "Pneumonia, Viral"[Mesh])

AND

(reopen OR strateg\* OR "exit strategy\*" OR coping OR lockdown OR shutdown OR measures OR solution\* OR "national surveillance" OR management OR re-emergence OR re-emerge OR "epidemiologic surveillance" OR "local containment" OR intervention))  
AND "humans"[MeSH Terms]

**SCOPUS**

("Pandemics organization" OR "Pandemics administration" OR "Pandemics prevention" OR "Pandemics control" OR "Disease Outbreaks organization" OR "Disease Outbreaks administration" OR "Epidemics organization" OR "Epidemics administration" OR "Epidemics prevention" OR "Epidemics control")

AND

("Viral pneumonia" OR "SARS Virus" OR "MERS-COV" OR "Middle East Respiratory Syndrome Coronavirus" OR "post-MERS-CoV" OR "Influenza Pandemic, 1918-1919" OR "Influenza A Virus, H1N1 Subtype" OR "severe acute respiratory syndrome coronavirus 2" OR "COVID19" OR "covid19" OR "covid-19" OR "COVID-19" OR "novel coronavirus" OR "new coronavirus" OR "coronavirus disease 2019" OR "SARS-CoV-2" OR "post-COVID-19" OR "post-outbreak" OR "post-pandemic" OR "2019-nCoV" OR "Wuhan coronavirus" OR "coronavirus disease-19" OR "SARS2")

AND

("reopen" OR "strategy" OR "strategies" OR "coping" OR "lockdown" OR "shutdown" OR "measures" OR "solution" OR "solutions" OR "surveillance" OR "management" OR "re-emergence" OR "re-emerge" OR "local containment" OR "intervention")

**WEB OF SCIENCE**

TS=(Pandemics OR "Disease Outbreaks" OR Epidemics OR "Pneumonia, Viral") AND ("SARS Virus" OR "Middle East Respiratory Syndrome Coronavirus" OR "post-MERS-CoV" OR "Influenza Pandemic, 1918-1919" OR "Influenza A Virus, H1N1 Subtype" OR "COVID-19" OR "severe acute respiratory syndrome coronavirus 2" OR COVID19 OR covid19 OR covid-19 OR COVID-19 OR "novel coronavirus" OR "new coronavirus" OR "coronavirus disease 2019" OR

SARS-CoV-2 OR post-COVID-19 OR post-outbreak OR post-pandemic) AND (reopen OR strategies OR “exit strategy” OR coping OR lockdown OR shutdown OR measures OR solution OR “national surveillance” OR management OR intervention OR “epidemiologic surveillance” OR “local containment”))

## COCHRANE

ID Search

#1 MeSH descriptor: [SARS Virus] explode all trees

#2 MeSH descriptor: [Middle East Respiratory Syndrome Coronavirus] explode all trees

#3 MeSH descriptor: [Influenza Pandemic, 1918-1919] explode all trees

#4 MeSH descriptor: [Influenza A Virus, H1N1 Subtype] explode all trees

#5 (post-MERS-CoV OR COVID19 OR covid19 OR covid-19 OR COVID-19 OR “novel coronavirus” OR “new coronavirus” OR “coronavirus disease 2019” OR SARS-CoV-2 OR post-COVID-19 OR post-outbreak OR post-pandemic)

#6 #1 OR #2 OR #3 OR #4 OR #5

#7 MeSH descriptor: [Disease Outbreaks] explode all trees

#8 MeSH descriptor: [Pandemics] explode all trees

#9 MeSH descriptor: [Epidemics] explode all trees

#10 #7 OR #8 OR #9

#11 #6 OR #10

#12 (intervention OR reopen OR strategies OR “exit strategy” OR coping OR lockdown OR shutdown OR measures OR solution OR “national surveillance” OR management OR “epidemiologic surveillance”):ti,ab,kw

#13 #11 AND #12

---
