# Supplementary material for: How health systems approached respiratory viral pandemics over time: a systematic review
Source: HighWire-hosted journal article supplement (doi:10.1136/bmjgh-2020-003677), 2020-12-01
Supplement: bmjgh-2020-003677supp002_data_supplement.pdf [file bmjgh-2020-003677supp002_data_supplement.pdf]

| Case Report Studies                       |                                                                                                                                      |                                                                                              |                                                                                                                                          |                                                                                                  |                                                                                              |                                                                                                                                   |                                                                                         |                                                                                         |                                                                                                                                                 |                                                                                                         |                                            |                    |                   |
|-------------------------------------------|--------------------------------------------------------------------------------------------------------------------------------------|----------------------------------------------------------------------------------------------|------------------------------------------------------------------------------------------------------------------------------------------|--------------------------------------------------------------------------------------------------|----------------------------------------------------------------------------------------------|-----------------------------------------------------------------------------------------------------------------------------------|-----------------------------------------------------------------------------------------|-----------------------------------------------------------------------------------------|-------------------------------------------------------------------------------------------------------------------------------------------------|---------------------------------------------------------------------------------------------------------|--------------------------------------------|--------------------|-------------------|
|                                           | Were patient's demographic characteristics clearly described?                                                                        | Was the patient's history clearly described and presented as a timeline?                     | Was the current clinical condition of the patient on presentation clearly described?                                                     | Were diagnostic tests or assessment methods and the results clearly described?                   | Was the intervention(s) or treatment procedure(s) clearly described?                         | Was the post-intervention clinical condition clearly described?                                                                   | Were adverse events (harms) or unanticipated events identified and described?           | Does the case report provide takeaway lessons?                                          |                                                                                                                                                 | Criteria satisfied                                                                                      | Overall appraisal                          |                    |                   |
| Chen et al, 2020                          | Yes                                                                                                                                  | Yes                                                                                          | Yes                                                                                                                                      | Yes                                                                                              | Yes                                                                                          | Yes                                                                                                                               | No                                                                                      | Yes                                                                                     |                                                                                                                                                 | 87,50%                                                                                                  | Good                                       |                    |                   |
| Combs et al, 2020                         | Yes                                                                                                                                  | Yes                                                                                          | NA                                                                                                                                       | No                                                                                               | Yes                                                                                          | NA                                                                                                                                | No                                                                                      | Yes                                                                                     |                                                                                                                                                 | 50%                                                                                                     | Moderate                                   |                    |                   |
| Williams et al, 2017                      | Yes                                                                                                                                  | NA                                                                                           | NA                                                                                                                                       | No                                                                                               | Yes                                                                                          | NA                                                                                                                                | Yes                                                                                     | Yes                                                                                     |                                                                                                                                                 | 50%                                                                                                     | Moderate                                   |                    |                   |
| Park et al, 2020                          | Yes                                                                                                                                  | Yes                                                                                          | Yes                                                                                                                                      | Yes                                                                                              | Yes                                                                                          | Yes                                                                                                                               | No                                                                                      | Yes                                                                                     |                                                                                                                                                 | 87,50%                                                                                                  | Good                                       |                    |                   |
| Chen-Yi Chu et al, 2010                   | Yes                                                                                                                                  | Yes                                                                                          | Yes                                                                                                                                      | Yes                                                                                              | Yes                                                                                          | No                                                                                                                                | No                                                                                      | Yes                                                                                     |                                                                                                                                                 | 75%                                                                                                     | Good                                       |                    |                   |
| Cross sectional studies                   |                                                                                                                                      |                                                                                              |                                                                                                                                          |                                                                                                  |                                                                                              |                                                                                                                                   |                                                                                         |                                                                                         |                                                                                                                                                 |                                                                                                         |                                            |                    |                   |
|                                           | Were the criteria for inclusion in the sample clearly defined?                                                                       | Were the study subjects and the setting described in detail?                                 | Was the exposure measured in a valid and reliable way?                                                                                   | Were objective, standard criteria used for measurement of the condition?                         | Were confounding factors identified?                                                         | Were strategies to deal with confounding factors stated?                                                                          | Were the outcomes measured in a valid and reliable way?                                 | Was appropriate statistical analysis used?                                              |                                                                                                                                                 | Criteria satisfied                                                                                      | Overall appraisal                          |                    |                   |
| Nahan et al, 2012                         | Yes                                                                                                                                  | Yes                                                                                          | NA                                                                                                                                       | Yes                                                                                              | No                                                                                           | No                                                                                                                                | Yes                                                                                     | No                                                                                      |                                                                                                                                                 | 50%                                                                                                     | Moderate                                   |                    |                   |
| Cohort studies                            |                                                                                                                                      |                                                                                              |                                                                                                                                          |                                                                                                  |                                                                                              |                                                                                                                                   |                                                                                         |                                                                                         |                                                                                                                                                 |                                                                                                         |                                            |                    |                   |
|                                           | Were the two groups similar and recruited from the same population?                                                                  | Were the exposures measured similarly to assign people to both exposed and unexposed groups? | Was the exposure measured in a valid and reliable way?                                                                                   | Were confounding factors identified?                                                             | Were strategies to deal with confounding factors stated?                                     | Were the groups/participants free of the outcome at the start of the study (or at the moment of exposure)?                        | Were the outcomes measured in a valid and reliable way?                                 | Was the follow up time reported and sufficient to be long enough for outcomes to occur? | Was follow up complete, and if not, were the reasons to loss to follow up described and explored?                                               | Were strategies to address incomplete follow up utilized?                                               | Was appropriate statistical analysis used? | Criteria satisfied | Overall appraisal |
| Varughese et al, 2015                     | Yes                                                                                                                                  | Yes                                                                                          | Yes                                                                                                                                      | Yes                                                                                              | Yes                                                                                          | Yes                                                                                                                               | Yes                                                                                     | Yes                                                                                     | Yes                                                                                                                                             | NA                                                                                                      | NA                                         | 81,80%             | Good              |
| Quasi-Cluster Randomized Controlled Trial |                                                                                                                                      |                                                                                              |                                                                                                                                          |                                                                                                  |                                                                                              |                                                                                                                                   |                                                                                         |                                                                                         |                                                                                                                                                 |                                                                                                         |                                            |                    |                   |
|                                           | Is it clear in the study what is the 'cause' and what is the 'effect' (i.e. there is no confusion about which variable comes first)? | Were the participants included in any comparisons similar?                                   | Were the participants included in any comparisons receiving similar treatment/care, other than the exposure or intervention of interest? | Was there a control group?                                                                       | Were there multiple measurements of the outcome both pre and post the intervention/exposure? | Was follow up complete and if not, were differences between groups in terms of their follow up adequately described and analyzed? | Were the outcomes of participants included in any comparisons measured in the same way? | Were outcomes measured in a reliable way?                                               | Was appropriate statistical analysis used?                                                                                                      | Criteria satisfied                                                                                      | Overall appraisal                          |                    |                   |
| Miyaki et al, 2011                        | Yes                                                                                                                                  | Yes                                                                                          | NA                                                                                                                                       | Yes                                                                                              | No                                                                                           | Yes                                                                                                                               | Yes                                                                                     | Yes                                                                                     | Yes                                                                                                                                             | 77,80%                                                                                                  | Good                                       |                    |                   |
| Qualitative studies                       |                                                                                                                                      |                                                                                              |                                                                                                                                          |                                                                                                  |                                                                                              |                                                                                                                                   |                                                                                         |                                                                                         |                                                                                                                                                 |                                                                                                         |                                            |                    |                   |
|                                           | Is there congruity between the stated philosophical perspective and the research methodology?                                        | Is there congruity between the research methodology and the research question or objectives? | Is there congruity between the research methodology and the methods used to collect data?                                                | Is there congruity between the research methodology and the representation and analysis of data? | Is there congruity between the research methodology and the interpretation of results?       | Is there a statement locating the researcher culturally or theoretically?                                                         | Is the influence of the researcher on the research, and vice-versa, addressed?          | Are participants, and their voices, adequately represented?                             | Is the research ethical according to current criteria or, for recent studies, and is there evidence of ethical approval by an appropriate body? | Do the conclusions drawn in the research report flow from the analysis, or interpretation, of the data? | Criteria satisfied                         | Overall appraisal  |                   |
| Rebmann et al, 2013                       | Yes                                                                                                                                  | Yes                                                                                          | Yes                                                                                                                                      | Yes                                                                                              | Yes                                                                                          | Yes                                                                                                                               | No                                                                                      | Yes                                                                                     | Yes                                                                                                                                             | 90%                                                                                                     | Good                                       |                    |                   |
| Charania et al, 2011                      | Yes                                                                                                                                  | Yes                                                                                          | Yes                                                                                                                                      | Yes                                                                                              | Yes                                                                                          | Yes                                                                                                                               | Yes                                                                                     | Yes                                                                                     | Yes                                                                                                                                             | 100%                                                                                                    | Good                                       |                    |                   |
| Ear, 2012                                 | yes                                                                                                                                  | Yes                                                                                          | Yes                                                                                                                                      | Yes                                                                                              | Yes                                                                                          | Yes                                                                                                                               | Yes                                                                                     | Yes                                                                                     | No                                                                                                                                              | 90%                                                                                                     | Good                                       |                    |                   |

| Before-after studies |                                                                                                                                          |                                                                                                                         |                                                                                                                                                                       |                                                                                             |                                                                                                    |                                                                                                                                     |                                                                                                                                    |                                                                                              |                                                                                                                   |                                                                                                                                                                                        |                                                                                                                                                                                  |                                                                                                                                                                                                                         |                    |                   |  |
|----------------------|------------------------------------------------------------------------------------------------------------------------------------------|-------------------------------------------------------------------------------------------------------------------------|-----------------------------------------------------------------------------------------------------------------------------------------------------------------------|---------------------------------------------------------------------------------------------|----------------------------------------------------------------------------------------------------|-------------------------------------------------------------------------------------------------------------------------------------|------------------------------------------------------------------------------------------------------------------------------------|----------------------------------------------------------------------------------------------|-------------------------------------------------------------------------------------------------------------------|----------------------------------------------------------------------------------------------------------------------------------------------------------------------------------------|----------------------------------------------------------------------------------------------------------------------------------------------------------------------------------|-------------------------------------------------------------------------------------------------------------------------------------------------------------------------------------------------------------------------|--------------------|-------------------|--|
|                      | Was the study question or objective clearly stated?                                                                                      | Were eligibility/selection criteria for the study population prespecified and clearly described?                        | Were the participants in the study representative of those who would be eligible for the test/service/intervention in the general or clinical population of interest? | Were all eligible participants that met the prespecified entry criteria enrolled?           | Was the sample size sufficiently large to provide confidence in the findings?                      | Was the test/service/intervention clearly described and delivered consistently across the study population?                         | Were the outcome measures prespecified, clearly defined, valid, reliable, and assessed consistently across all study participants? | Were the people assessing the outcomes blinded to the participants' exposures/interventions? | Was the loss to follow-up after baseline 20% or less? Were those lost to follow-up accounted for in the analysis? | Did the statistical methods examine changes in outcome measures from before to after the intervention? Were statistical tests done that provided p values for the pre-to-post changes? | Were outcome measures of interest taken multiple times before the intervention and multiple times after the intervention (i.e., did they use an interrupted time series design)? | If the intervention was conducted at a group level (e.g., a whole hospital, a community, etc.) did the statistical analysis take into account the use of individual-level data to determine effects at the group level? | Criteria satisfied | Overall appraisal |  |
| Pershad et al, 2012  | Yes                                                                                                                                      | Yes                                                                                                                     | Yes                                                                                                                                                                   | Yes                                                                                         | Yes                                                                                                | Yes                                                                                                                                 | Yes                                                                                                                                | No                                                                                           | No                                                                                                                | Yes                                                                                                                                                                                    | No                                                                                                                                                                               | Yes                                                                                                                                                                                                                     | 75%                | Good              |  |
| Narrative Reviews    |                                                                                                                                          |                                                                                                                         |                                                                                                                                                                       |                                                                                             |                                                                                                    |                                                                                                                                     |                                                                                                                                    |                                                                                              |                                                                                                                   |                                                                                                                                                                                        |                                                                                                                                                                                  |                                                                                                                                                                                                                         |                    |                   |  |
|                      | Justification for the article's importance for the readership. Not justified/ Alluded but not explicitly justified/ Explicitly justified | Statements of concrete aim or formulation of questions. None formulated/ Formulated generally/ Concrete aims formulated | Description of the literature search. Not presented/ Described briefly/ described in details                                                                          | Referencing. Not supported by references/ Referencing inconsistent/ Supported by references | Scientific reasoning. Not based on appropriate arguments/ Selective evidence/ Appropriate evidence | Appropriate presentation of data. Data presented inadequately/ Data presented in an inappropriate manner/ Data presented adequately | Criteria satisfied                                                                                                                 | Overall appraisal                                                                            |                                                                                                                   |                                                                                                                                                                                        |                                                                                                                                                                                  |                                                                                                                                                                                                                         |                    |                   |  |
| Krumkamp et al, 2009 | 2                                                                                                                                        | 2                                                                                                                       | 2                                                                                                                                                                     | 2                                                                                           | 2                                                                                                  | 2                                                                                                                                   | 2                                                                                                                                  | 100%                                                                                         | Good                                                                                                              |                                                                                                                                                                                        |                                                                                                                                                                                  |                                                                                                                                                                                                                         |                    |                   |  |
| Shah et al, 2020     | 2                                                                                                                                        | 2                                                                                                                       | 2                                                                                                                                                                     | 2                                                                                           | 2                                                                                                  | 2                                                                                                                                   | 2                                                                                                                                  | 100%                                                                                         | Good                                                                                                              |                                                                                                                                                                                        |                                                                                                                                                                                  |                                                                                                                                                                                                                         |                    |                   |  |
